# Supplementary material
Source: publisher site journal article supplement (https://www.spandidos-publications.com/2641/downloadSupplementary)

Figure S1. Synthesis of HMPH from curcumin. Reagents and conditions: (i)  $\text{NaHB}_4$ , THF, room temperature; (ii) *p*-toluenesulphonic acid, THF, reflux. THF, tetrahydrofuran. HMPH, 1,7-bis(4-hydroxy-3-methoxyphenyl)-1,4,6-heptatrien-3-one.

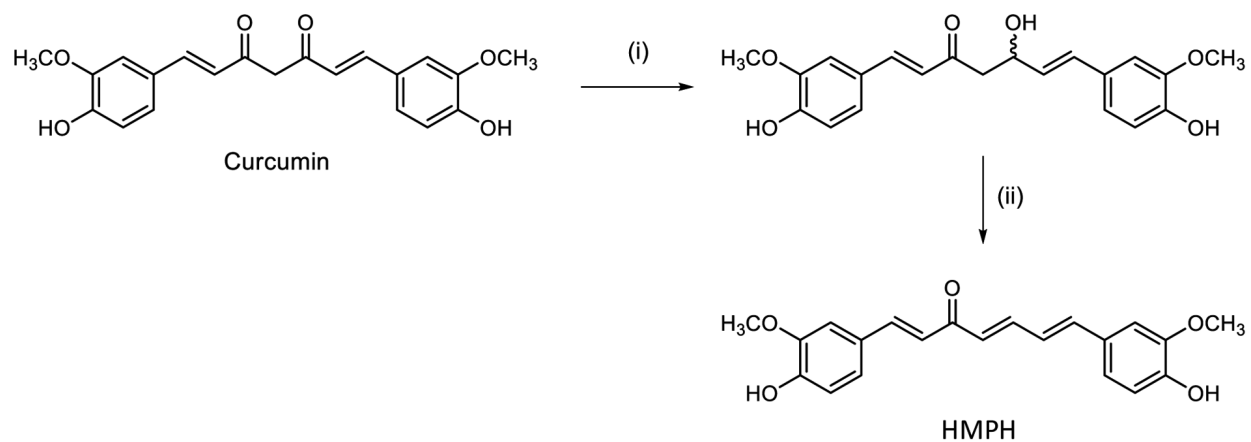

Figure S2.  $^1\text{H}$  NMR spectrum of 1,7-bis(4-hydroxy-3-methoxyphenyl)-1,4,6-heptatrien-3-one in  $\text{CDCl}_3$ .

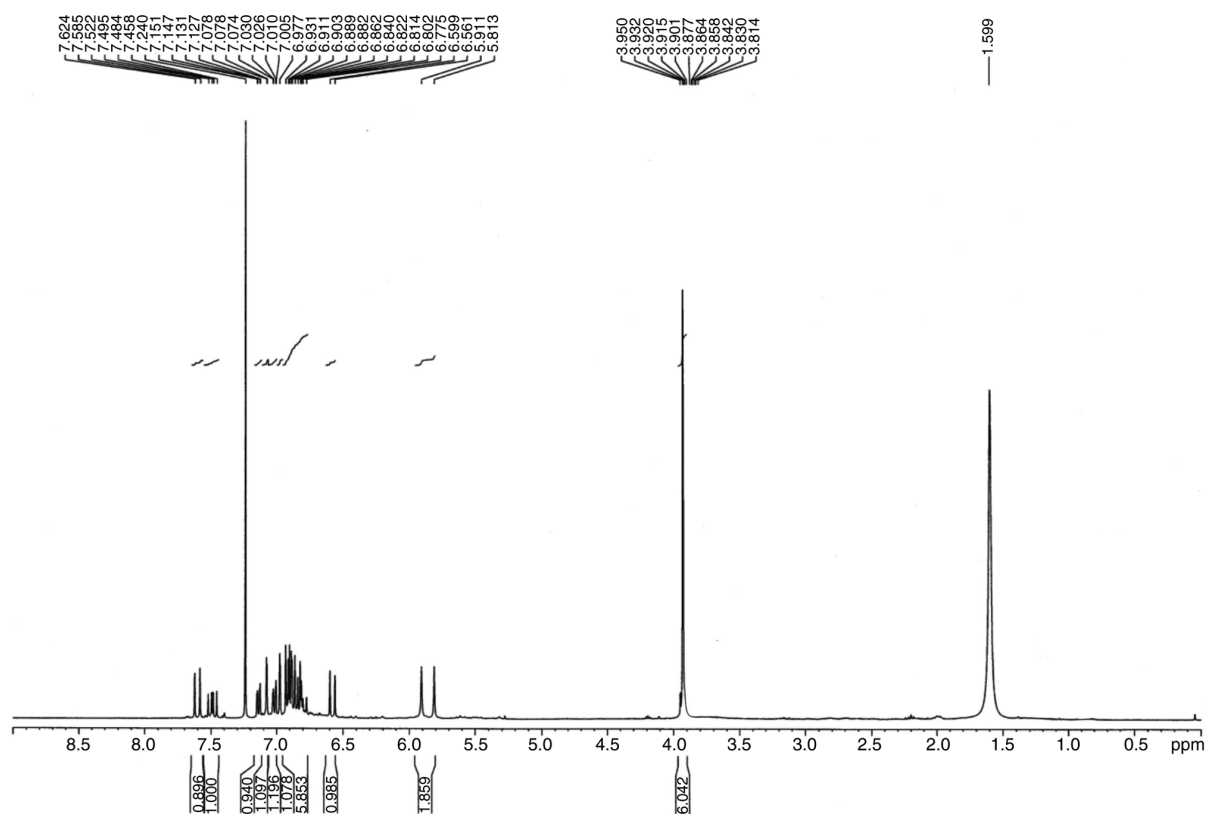

Figure S3.  $^{13}\text{C}$  NMR spectrum of 1,7-bis(4-hydroxy-3-methoxyphenyl)-1,4,6-heptatrien-3-one in  $\text{CDCl}_3$ .

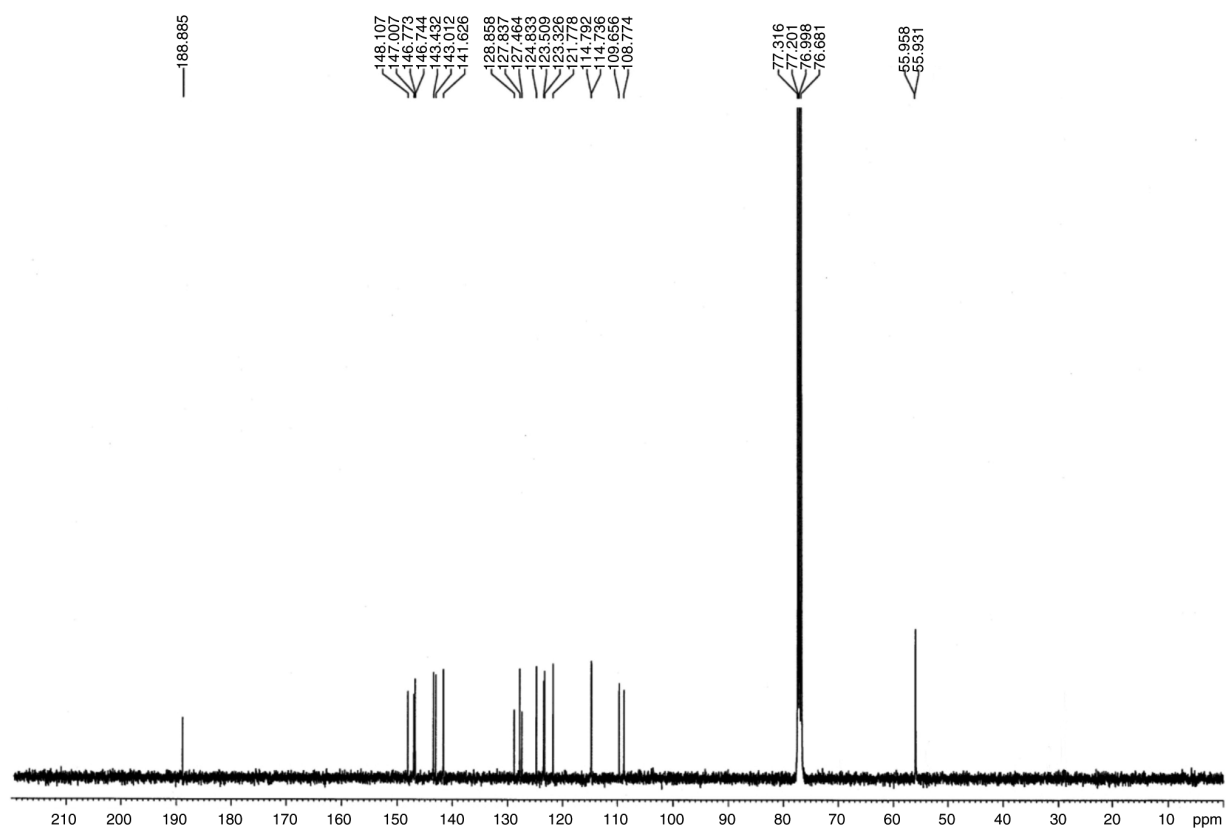

Figure S4. Immunofluorescence micrographs of p65 NF- $\kappa$ B translocation in RAW264.7 cells. RAW264.7 cells were grown on coverslips under standard conditions without any treatment (control) or with LPS treatment alone (10 ng/ml) for 15 min. The effects of test compounds on p65 NF- $\kappa$ B translocation were performed by treating cells with BAY 11-7082 at 10  $\mu$ M, curcumin at 20  $\mu$ M and HMPH at 20  $\mu$ M for 1 h followed by LPS stimulation (10 ng/ml) for 15 min. Nuclear p65 NF- $\kappa$ B translocation was detected using an anti-p65 NF- $\kappa$ B antibody and an Alexa Fluor-488-conjugated secondary antibody (green fluorescence). The nucleus was stained with PI (red fluorescence). Scale bar, 25  $\mu$ m. The images were acquired by confocal laser scanning microscopy. LPS, lipopolysaccharide; PI, propidium iodide; NF- $\kappa$ B, nuclear factor- $\kappa$ B. HMPH, 1,7-bis(4-hydroxy-3-methoxyphenyl)-1,4,6-heptatrien-3-one.

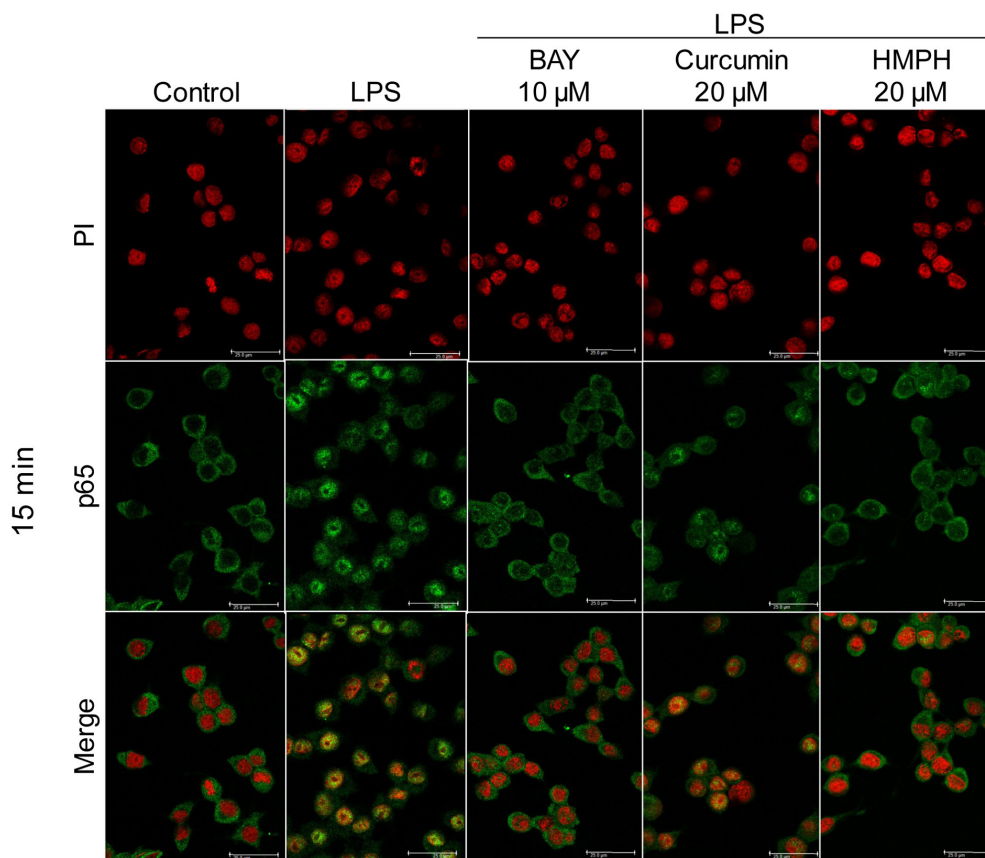

Figure S5. Immunofluorescence micrographs of p65 NF- $\kappa$ B translocation in RAW264.7 cells. RAW264.7 cells were grown on coverslips under standard conditions without any treatment (control) or with LPS treatment alone (10 ng/ml) for 30 min. The effects of test compounds on p65 NF- $\kappa$ B translocation were performed by treating the cells with BAY 11-7082 at 10  $\mu$ M, curcumin at 20  $\mu$ M and HMPH at 20  $\mu$ M for 1 h followed by LPS stimulation (10 ng/ml) for 30 min. Nuclear p65 NF- $\kappa$ B translocation was detected with an anti-p65 NF- $\kappa$ B antibody and an Alexa Fluor-488-conjugated secondary antibody (green fluorescence). The nucleus was stained with PI (red fluorescence). Scale bar, 25  $\mu$ m. The images were acquired by confocal laser scanning microscopy. LPS, lipopolysaccharide; PI, propidium iodide; NF- $\kappa$ B, nuclear factor- $\kappa$ B. HMPH, 1,7-bis(4-hydroxy-3-methoxyphenyl)-1,4,6-heptatrien-3-one.

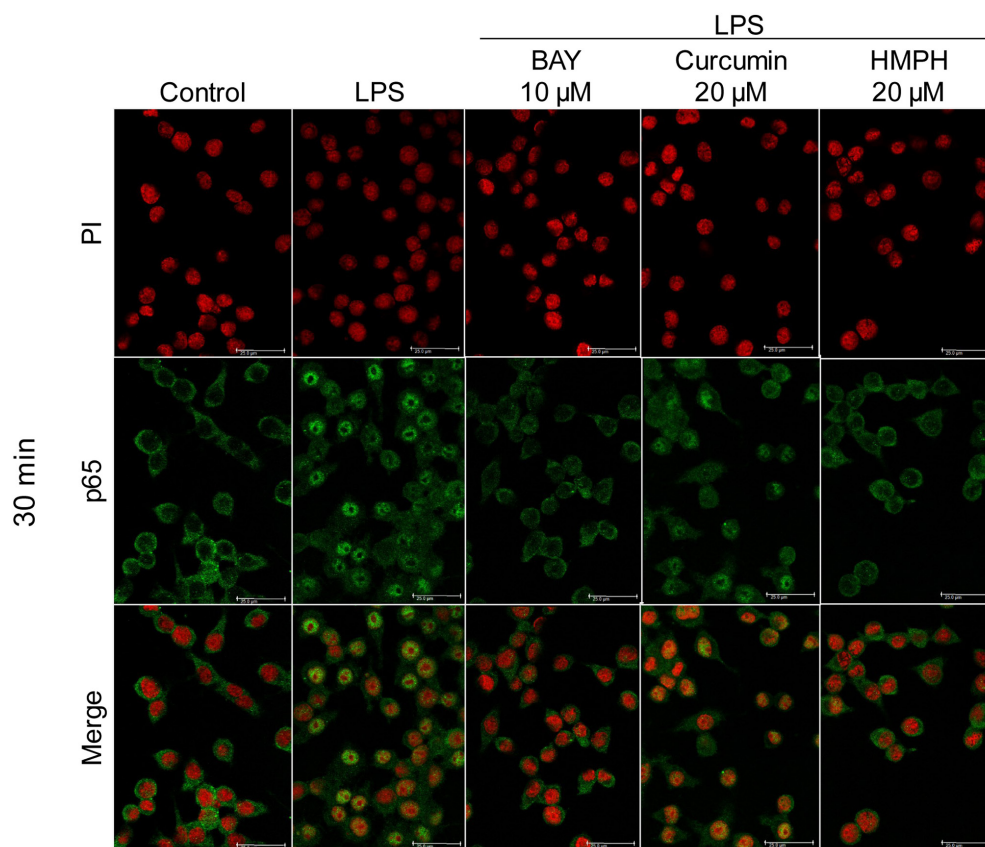

Supplement: Supplementary file 1 [file downloadSupplementary]
